# Supplementary material
Source: PubMed Central journal article supplement (PMC7062211)

## **Supplemental Table of Contents**

### **Supplemental Table 1. Primer sequences**

**Supplemental Figure 1. Validation of *Cdh5-Cre* driven recombination of the *Phd2* flox allele in the kidney.**

**Supplemental Figure 2. Endothelial *Phd2* ablation does not alter serum BUN levels 1 day following bilateral IRI.**

**Supplemental Figure 3. Endothelial *Phd2* deletion does not alter post-ischemic HIF stabilization in the kidney at day 3 post unilateral renal IRI.**

**Supplemental Figure 4. Single cell transcriptomic analysis of *Phds/Eglns* in kidney endothelial cells.**

**Supplemental Figure 5. Concurrent endothelial *Phd2* and *Hif2* deletion does not alter post-ischemic kidney mRNA levels of *Il-1b* and *Il-6* at day 3 post unilateral renal IRI.**

**Supplemental Figure 6. Inducible endothelial specific inactivation of *Phd2* attenuates histological kidney injury at day 3 following renal IRI.**

**Supplemental Figure 7. Endothelial *Phd2* ablation does not influence serum kynurenic acid and  $\alpha$ -ketoglutarate levels.**

**Supplemental Figures 1-7**

**Supplemental Table 1.** Primer sequences. Shown are sequences of primer sets used for the expression analysis of the indicated genes by RT-PCR.

| <b>Gene</b>             | <b>Forward Primer</b><br><b>Reverse Primer</b>                   |
|-------------------------|------------------------------------------------------------------|
| <i>Kim1</i><br>(mouse)  | 5'-AAACCAGAGATTCCCACACG-3'<br>5'-GTCGTGGGTCTTCCTGTAGC-3'         |
| <i>Loxl2</i><br>(mouse) | 5'-GATCTTCAGCCCCGATGGA-3'<br>5'-CAAGGGTTGCTCTGGCTTGT-3'          |
| <i>Tgfβ1</i><br>(mouse) | 5'-TGGCGAGCCTTAGTTTGGGA-3'<br>5'-TCGACATGGAGCTGGTGAAA-3'         |
| <i>Acta2</i><br>(mouse) | 5'-CCTGACGCTGAAGTATCCGATAG-3'<br>5'-TTTTCCATGTCGTCCCAGTTG-3'     |
| <i>Pgk1</i><br>(mouse)  | 5'-CAAACAACCAAAGGATCAAGG-3'<br>5'-CCCAAGATAGCCAGGAAGG-3'         |
| <i>Pdk1</i><br>(mouse)  | 5'-GTTAGGGATAGGGTTGGAGATCTTT-3'<br>5'-TCACAGGATGGTTGGTTCTTTCT-3' |
| <i>Ldha</i><br>(mouse)  | 5'-CGTCTCCCTGAAGTCTCTTAACC-3'<br>5'-CCCACACCATCTCAACACC-3'       |
| <i>Kdr</i><br>(mouse)   | 5'-ACTGCAGTGATTGCCATGTTCT-3'<br>5'-TCATTGGCCCGCTTAACG-3'         |
| <i>Emcn</i><br>(mouse)  | 5'-TGCAACCACTCCATCAACCA-3'<br>5'-CGCGATAACCACAGGCAAA-3'          |
| <i>Vcam1</i><br>(mouse) | 5'-TAGAGTGCAAGGAGTTCGGG-3'<br>5'-CCGGCATATACGAGTGTGAA-3'         |
| <i>Icam1</i><br>(mouse) | 5'-TGGATACCTGAGCATCACCA-3'<br>5'-CTGCTACCTGCACTTTGCC-3'          |
| <i>Cxcl1</i><br>(mouse) | 5'-GCAGACCATGGCTGGGATT-3'<br>5'-CCTGAGGGCAACACCTTCAA-3'          |

|                         |                                                              |
|-------------------------|--------------------------------------------------------------|
| <i>Cxcl2</i><br>(mouse) | 5'-GCGCCCAGACAGAAGTCATAG-3'<br>5'-AGGGTCAAGGCAAACCTTTTTGA-3' |
| <i>Tnfa</i><br>(mouse)  | 5'-GCTGAGCTCAAACCCTGGTA-3'<br>5'-CGGACTCCGCAAAGTCTAAG-3'     |
| <i>VCAM1</i><br>(human) | 5'-GCTTCAGGAGCTGAATACCC-3'<br>5'-AAGGATCACGACCATCTTCC-3'     |
| <i>IRF-1</i><br>(human) | 5'-TTTCGCTGTGCCATGAACTC-3'<br>5'-TGTTCCCTGCTCTGGTCTTTCAC-3'  |

**Supplemental Figure 1. Validation of *Cdh5-Cre* driven recombination of the *Phd2* flox allele in the kidney.** Recombination analysis of *Phd2* flox allele in genomic DNA isolated from kidneys of *EC-Phd2* mice or their *Cre-* littermate controls. Primers used, amplify the conditional (2-lox) and the recombined (1-lox) allele.

**Supplemental Figure 2. Endothelial *Phd2* ablation does not alter serum BUN levels 1 day following bilateral IRI.** Shown are serum BUN levels in *EC-Phd2* mice or their *Cre-* littermate controls at day 1 after bilateral IRI (n=16-17; P>0.5, 2-tailed Student's t-test). ns, not statistically significant

**Supplemental Figure 3. Endothelial *Phd2* deletion does not alter post-ischemic kidney stabilization of HIF at day 3 post unilateral renal IRI.** (A) Shown is immunoblot analysis of HIF-1 $\alpha$  and HIF-2 $\alpha$  in post-ischemic kidneys from *EC-Phd2* and *Cre-* controls at day 3 post unilateral renal IRI. Ponceau S staining was used to assess for equal protein loading. Nuclear kidney extracts from a mouse treated with an oral PHD inhibitor served as positive control (+Co). Right graphs show densitometric analyses of HIF-1 $\alpha$  and HIF-2 $\alpha$  normalized to Ponceau. (B) Representative images of immunofluorescence detection of HIF-1 on kidney cryosections from *EC-Phd2;mT/mG* and *EC;mT/mG* mice at day 3 following unilateral renal artery clamping compared to uninjured kidneys. Shown are merged images of mTomato (red), EGFP (green) and HIF-1 staining (white) with (top 2 rows) or without DAPI (bottom 2 rows). Non-recombined cells express membrane-bound mTomato while recombined cells express membrane-bound EGFP. In the *EC-Phd2;mT/mG* mice, EGFP<sup>+</sup> cells represent *Phd2* deficient ECs whereas in the *EC;mT/mG* controls, EGFP<sup>+</sup> cells correspond to ECs competent for *Phd2*. Insets, top 2 rows: higher magnification views from dashed square marked areas showing ECs without evidence of HIF

staining. Overall, at day 3 post IRI the staining for HIF-1 was rare and there was no difference in endothelial HIF-1 between mutants and controls. Yellow arrows indicate HIF-1 stained nuclei. Scale bars indicate 50  $\mu$ m.

**Supplemental Figure 4. Single cell transcriptomic analysis of *Phds/Eglns* in kidney endothelial cells.** The *t*-distributed stochastic neighbor embedding (tSNE) map demonstrates 16 distinct cell types revealed by unsupervised clustering. Right panel shows the magnified endothelial cell cluster, which consisted 2.29% of 43,745 analyzed cells. Bottom panel depicts heatmap showing the expression levels of *Egln1* (*Phd2*), *Egln2* (*Phd1*) and *Egln3* (*Phd3*) in kidney endothelial cells. The color scheme is based on z-score distribution.

**Supplemental Figure 5. Concurrent endothelial *Phd2* and *Hif2* deletion does not alter post-ischemic kidney mRNA levels of *Il-1b* and *Il-6* at day 3 post unilateral renal IRI.** Shown are mRNA levels of *Il-1b* and *Il-6* in post-ischemic and contralateral kidneys of *EC-Phd2Hif2* mice and their *Cre-* controls at day 3 post unilateral IRI (n=8; P>0.05, 1-way ANOVA with Sidak correction for multiple comparisons).

**Supplemental Figure 6. Inducible endothelial specific inactivation of *Phd2* attenuates histological kidney injury at day 3 following renal IRI.** (A) Background autofluorescence indicated by the percentage of GFP<sup>+</sup> cells in bone marrow of *Cre-* (*mT/mG*) mice. (B) Recombination analysis of *Phd2* flox allele in genomic DNA isolated from kidney, lung, liver and heart following tamoxifen treatment of *iEC-Phd2* and *Cre-* mice. (C) Acute injury scores in post-

ischemic kidneys of tamoxifen treated *iEC-Phd2* and *Cre-* mice at day 3 following kidney IRI (n=5-4; P=0.0446, 2-tailed Student's t-test).

**Supplemental Figure 7. Endothelial *Phd2* ablation does not influence serum kynurenic acid and  $\alpha$ -ketoglutarate levels.** Serum kynurenic acid and  $\alpha$ -ketoglutarate levels for *EC-Phd2* and *Cre-* mice measured by LC/MS and GC/MS respectively (n=8, P>0.05, 2-tailed Student's t-test).

# Supplemental Figure 1

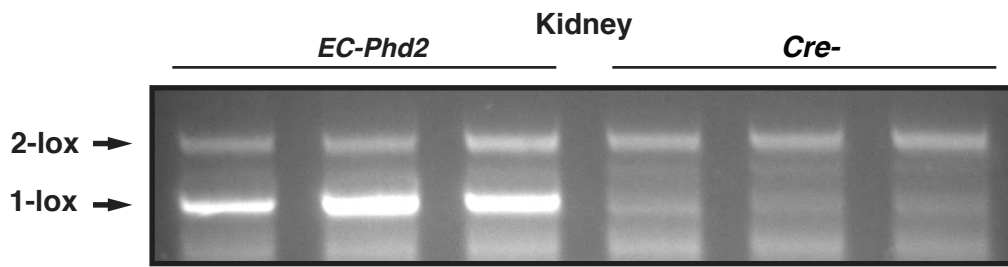

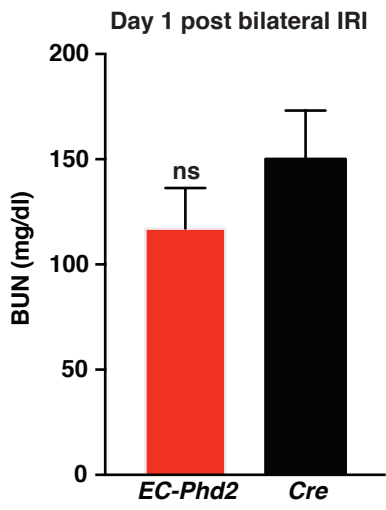



**A.**

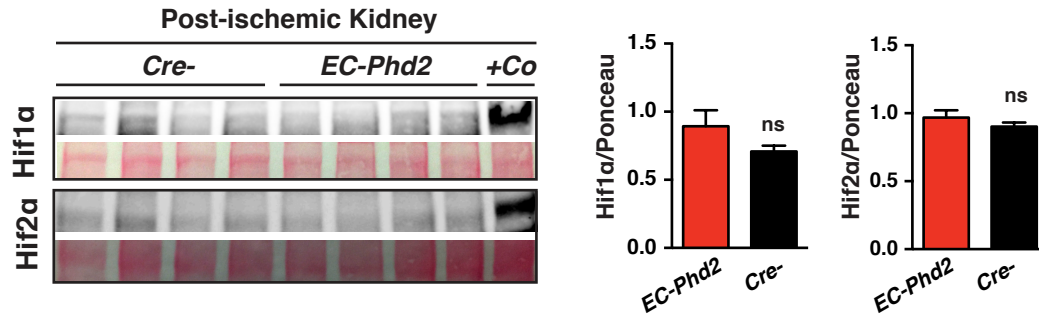

**B.**

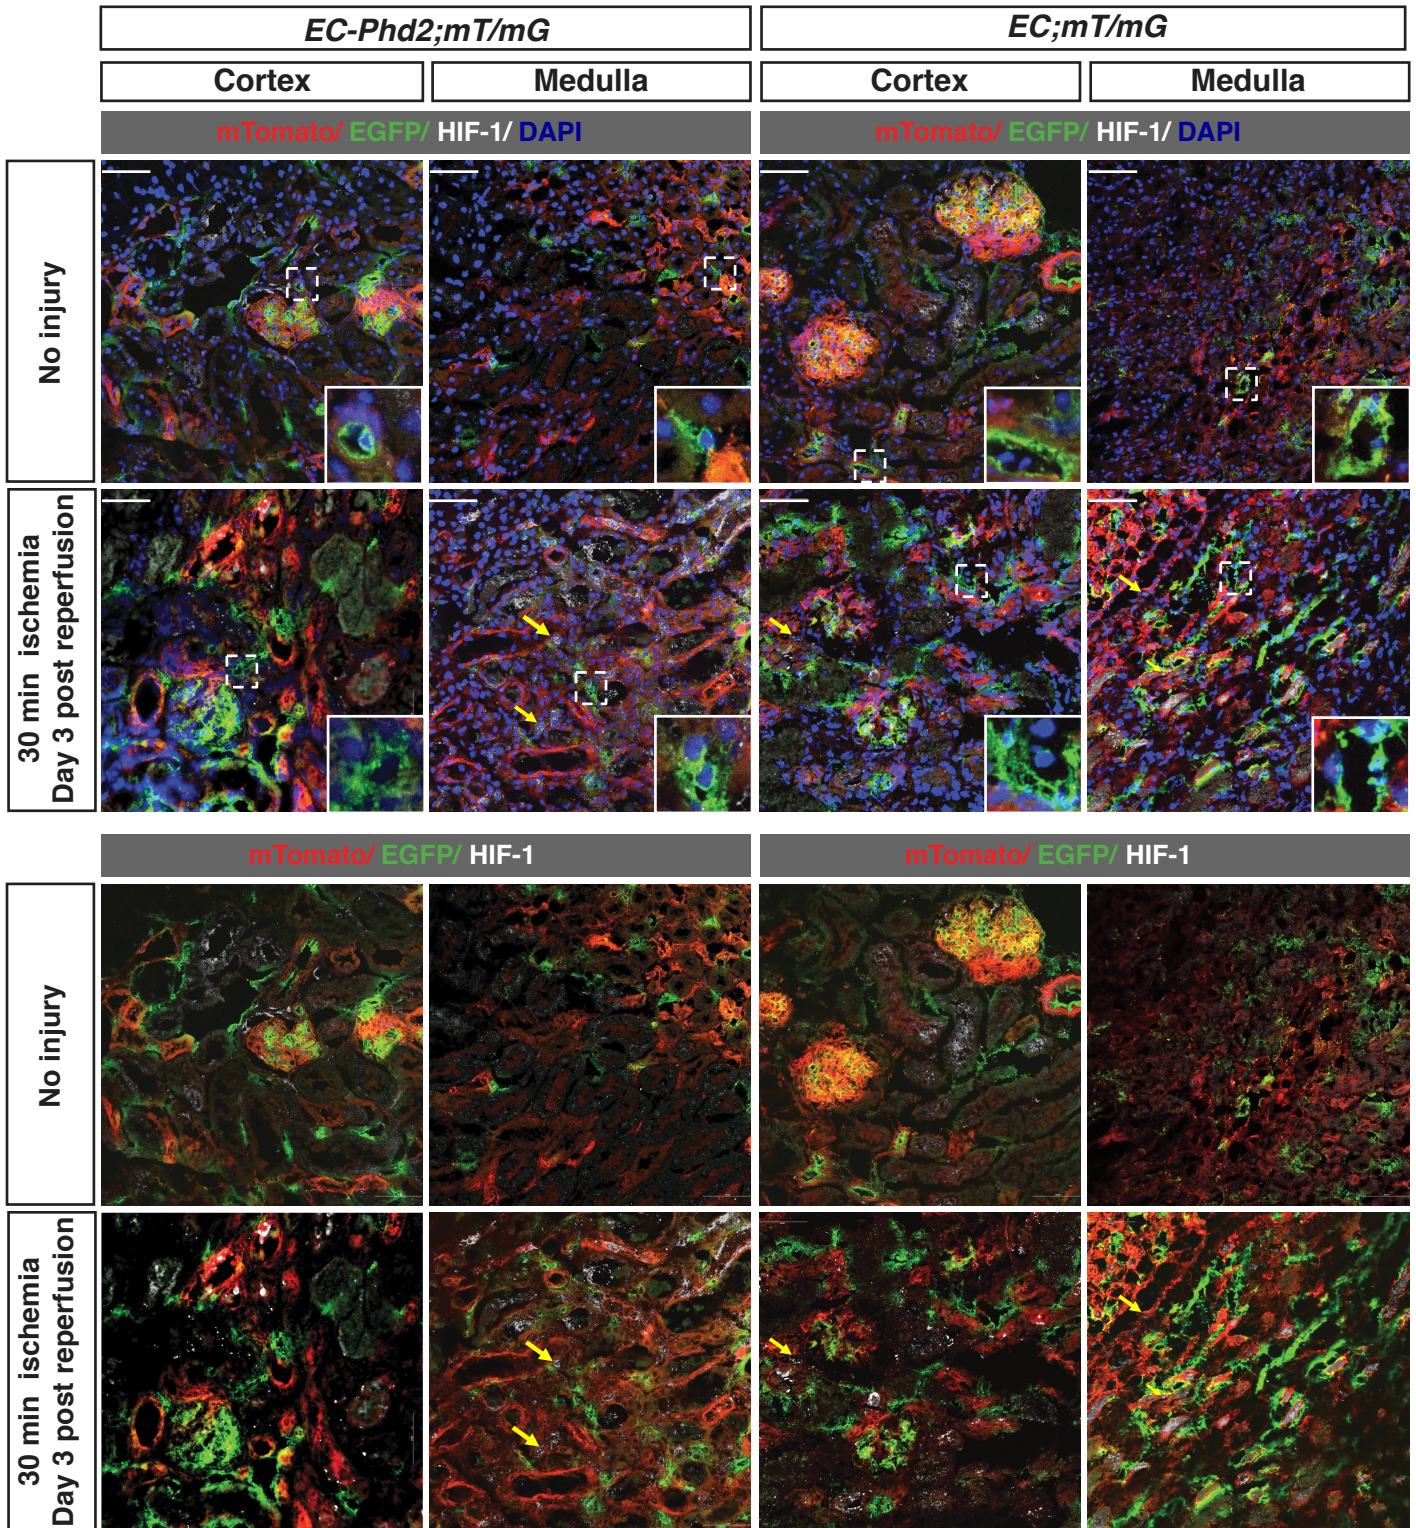

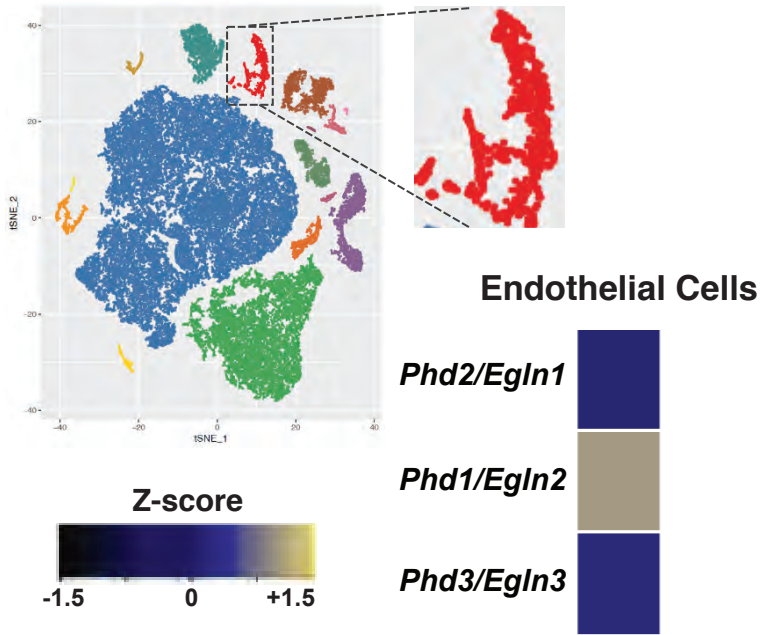

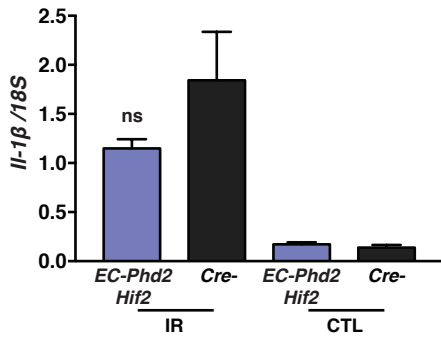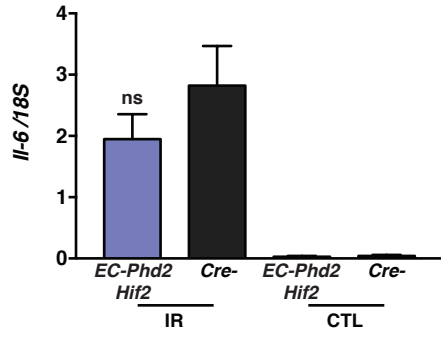

**A.**

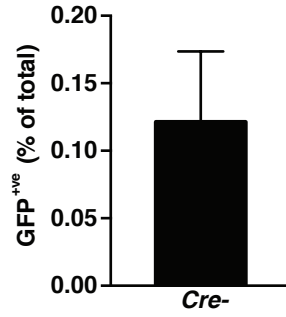

**B.**

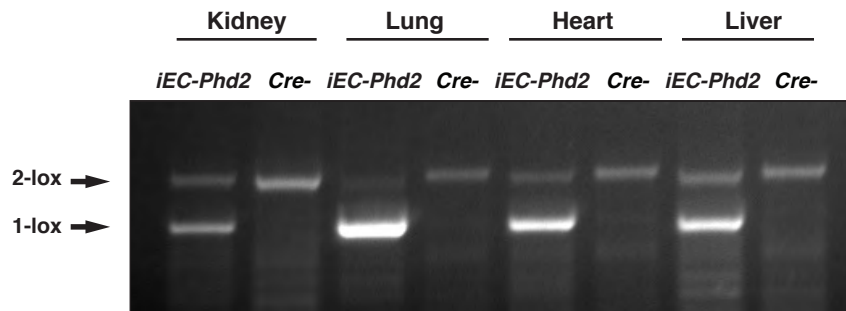

**C.**

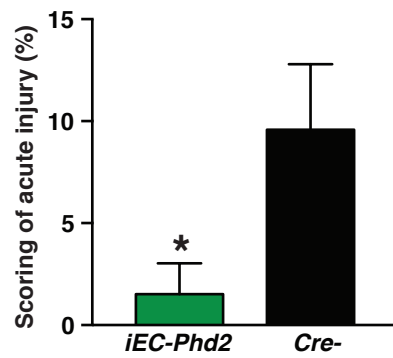

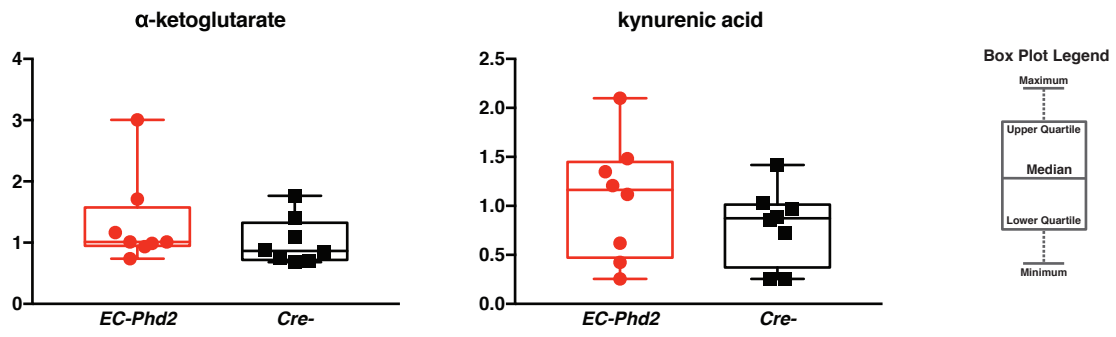

Supplement: ASN.2019050523SupplementaryData.pdf [file ASN.2019050523SupplementaryData.pdf]
